# Supplementary material for: Can Additional Homeopathic Treatment Save Costs? A Retrospective Cost-Analysis Based on 44500 Insured Persons
Source: PubMed Central journal article supplement (PMC4521756; doi:10.1371/journal.pone.0134657), 2015-07-31
Supplement: pone.0134657.s001.pdf [file pone.0134657.s001.pdf]

**S1 Table. Adjusted means for different cost types and diagnoses over 18 months after the beginning of the integrated care contract, societal perspective**

|                       | Type of cost             | Homeopathy               |                                     | Control                |                                     | p-value           |
|-----------------------|--------------------------|--------------------------|-------------------------------------|------------------------|-------------------------------------|-------------------|
|                       |                          | N Cost utilization       | Adj. mean (EUR) (95% CI)            | N Cost utilization     | Adj. mean (EUR) (95% CI)            |                   |
| All n=44550           | Integrated care contract | 22272                    | 228.00 (226.66–229.35)              | –                      | –                                   | <0.0001           |
|                       | Outpatient               | 22271                    | 1088.25 (1073.90–1102.59)           | 22275                  | 867.87 (853.52–882.21)              | <0.0001           |
|                       | Homeopathic physician    | 21658                    | 165.32 (163.45–167.20)              | 606                    | 25.50 (23.62–27.37)                 | <0.0001           |
|                       | Other physicians         | 21802                    | 950.49 (933.17–967.80)              | 22275                  | 856.37 (839.06–873.69)              | <0.0001           |
|                       | Medication               | 19638                    | 773.27 (656.37–890.17)              | 20166                  | 579.64 (462.74–696.54)              | 0.022             |
|                       | Productivity loss        | 7960                     | 3698.00 (3586.48–3809.53)           | 7954                   | 3092.84 (2981.31–3204.37)           | <0.0001           |
|                       | Inpatient                | 4702                     | 959.65 (904.08–1015.22)             | 4334                   | 821.90 (766.33–877.47)              | 0.001             |
|                       | Other                    | 20604                    | 56.21 (54.54–57.88)                 | 17538                  | 54.64 (52.96–56.31)                 | 0.192             |
|                       | <b>Total</b>             | <b>22275</b>             | <b>7207.72 (7001.14–7414.29)</b>    | <b>22275</b>           | <b>5857.56 (5650.98–6064.13)</b>    | <b>&lt;0.0001</b> |
|                       | Depression n=6144        | Integrated care contract | 3072                                | 272.67 (268.52–276.81) | –                                   | –                 |
| Outpatient            |                          | 3072                     | 2023.03 (1973.21–2072.86)           | 3072                   | 1624.87 (1575.05–1674.70)           | <0.0001           |
| Homeopathic physician |                          | 2977                     | 212.33 (204.31–220.34)              | 111                    | 43.45 (35.43–51.46)                 | <0.0001           |
| Other physicians      |                          | 3061                     | 1808.88 (1759.62–1858.14)           | 3072                   | 1601.61 (1552.35–1650.86)           | <0.0001           |
| Medication            |                          | 2869                     | 1146.34 (1014.67–1278.02)           | 2952                   | 1084.14 (952.46–1215.81)            | 0.513             |
| Productivity loss     |                          | 1696                     | 9039.87 (8548.30–9531.45)           | 1593                   | 7616.13 (7124.56–8107.71)           | 0.0001            |
| Inpatient             |                          | 997                      | 1787.79 (1619.45–1956.13)           | 888                    | 1561.24 (1392.90–1729.58)           | 0.062             |
| Other                 |                          | 4083                     | 103.26 (96.90–109.62)               | 3501                   | 98.73 (92.37–105.09)                | 0.324             |
| <b>Total</b>          |                          | <b>3072</b>              | <b>15084.49 (14460.27–15708.71)</b> | <b>3072</b>            | <b>12797.66 (12173.44–13421.88)</b> | <b>&lt;0.0001</b> |
| Migraine n=1778       |                          | Integrated care contract | 889                                 | 248.65 (242.01–255.30) | –                                   | –                 |
|                       | Outpatient               | 888                      | 1191.03 (1123.33–1258.73)           | 889                    | 994.28 (926.59–1061.98)             | 0.0001            |
|                       | Homeopathic physician    | 858                      | 171.98 (163.92–180.04)              | 23                     | 24.21 (16.15–32.27)                 | <0.0001           |
|                       | Other physicians         | 882                      | 1025.20 (958.10–1092.30)            | 889                    | 978.68 (911.58–1045.78)             | 0.337             |
|                       | Medication               | 803                      | 529.76 (420.44–639.08)              | 838                    | 554.77 (445.45–664.10)              | 0.751             |
|                       | Productivity loss        | 467                      | 4945.54 (4324.02–5567.07)           | 458                    | 4062.14 (3440.61–4683.66)           | 0.049             |
|                       | Inpatient                | 213                      | 1173.94 (816.94–1530.93)            | 191                    | 1081.87 (724.88–1438.87)            | 0.721             |
|                       | Other                    | 963                      | 50.43 (44.11–56.76)                 | 833                    | 46.57 (40.24–52.89)                 | 0.397             |
|                       | <b>Total</b>             | <b>889</b>               | <b>8512.25 (7644.90–9379.59)</b>    | <b>889</b>             | <b>7115.62 (6248.27–7982.97)</b>    | <b>0.026</b>      |
|                       | All. Rhinitis n=2274     | Integrated care contract | 1137                                | 243.76 (237.87–249.64) | –                                   | –                 |
| Outpatient            |                          | 1137                     | 979.76 (933.65–1025.86)             | 1137                   | 783.78 (737.67–829.88)              | <0.0001           |
| Homeopathic physician |                          | 1102                     | 163.95 (156.90–171.00)              | 36                     | 20.58 (13.53–27.63)                 | <0.0001           |
| Other physicians      |                          | 1115                     | 820.34 (774.81–865.86)              | 1137                   | 766.60 (721.08–812.13)              | 0.102             |
| Medication            |                          | 1005                     | 574.59 (437.06–712.13)              | 1054                   | 449.92 (312.39–587.46)              | 0.209             |
| Productivity loss     |                          | 448                      | 3025.98 (2634.78–3417.17)           | 447                    | 2528.19 (2137.00–2919.38)           | 0.078             |
| Inpatient             |                          | 193                      | 586.16 (472.07–700.25)              | 212                    | 501.47 (387.38–615.57)              | 0.304             |
| Other                 |                          | 1048                     | 42.99 (35.79–50.20)                 | 880                    | 40.31 (33.10–47.51)                 | 0.605             |
| <b>Total</b>          |                          | <b>1137</b>              | <b>5763.05 (5252.59–6273.51)</b>    | <b>1137</b>            | <b>4642.93 (4132.47–5153.39)</b>    | <b>0.002</b>      |
| Asthma n=2494         |                          | Integrated care contract | 1247                                | 239.19 (233.20–245.18) | –                                   | –                 |
|                       | Outpatient               | 1247                     | 1114.48 (1043.70–1185.25)           | 1247                   | 940.38 (869.60–1011.15)             | 0.001             |
|                       | Homeopathic physician    | 1210                     | 166.79 (158.42–175.16)              | 27                     | 36.63 (28.26–45.00)                 | <0.0001           |
|                       | Other physicians         | 1236                     | 951.34 (844.67–1058.02)             | 1247                   | 948.83 (842.16–1055.50)             | 0.974             |
|                       | Medication               | 1191                     | 866.57 (742.54–990.60)              | 1208                   | 656.18 (532.15–780.21)              | 0.019             |
|                       | Productivity loss        | 430                      | 3241.45 (2845.82–3637.08)           | 427                    | 2550.37 (2154.75–2946.00)           | 0.016             |
|                       | Inpatient                | 283                      | 1026.66 (819.48–1233.84)            | 267                    | 896.91 (689.73–1104.09)             | 0.385             |
|                       | Other                    | 1201                     | 52.87 (45.91–59.82)                 | 1051                   | 56.71 (49.76–63.67)                 | 0.443             |
|                       | <b>Total</b>             | <b>1247</b>              | <b>6937.04 (6351.49–7522.60)</b>    | <b>1247</b>            | <b>5541.33 (4955.77–6126.88)</b>    | <b>0.001</b>      |
|                       | Atopic dermatitis n=976  | Integrated care contract | 1488                                | 218.26 (213.34–223.18) | –                                   | –                 |
| Outpatient            |                          | 1488                     | 917.18 (863.78–970.58)              | 1488                   | 702.63 (649.23–756.03)              | <0.0001           |
| Homeopathic physician |                          | 1456                     | 153.47 (148.75–158.19)              | 41                     | 22.86 (18.14–27.58)                 | <0.0001           |
| Other physicians      |                          | 1471                     | 797.39 (715.28–879.50)              | 1488                   | 678.52 (596.41–760.63)              | 0.045             |
| Medication            |                          | 1393                     | 439.42 (372.41–506.43)              | 1417                   | 405.63 (338.62–472.64)              | 0.485             |
| Productivity loss     |                          | 379                      | 1763.88 (1533.07–1994.69)           | 339                    | 1412.06 (1181.25–1642.87)           | 0.035             |
| Inpatient             |                          | 279                      | 570.51 (461.08–679.93)              | 242                    | 502.47 (393.04–611.89)              | 0.389             |
| Other                 |                          | 1202                     | 43.52 (39.22–47.83)                 | 1037                   | 45.39 (41.09–49.70)                 | 0.547             |
| <b>Total</b>          |                          | <b>1488</b>              | <b>4256.71 (3922.12–4591.31)</b>    | <b>1488</b>            | <b>3426.10 (3091.50–3760.70)</b>    | <b>0.001</b>      |
| Headache n=1926       |                          | Integrated care contract | 963                                 | 224.18 (217.91–230.46) | –                                   | –                 |
|                       | Outpatient               | 963                      | 1177.79 (1113.59–1241.99)           | 963                    | 879.65 (815.45–943.85)              | <0.0001           |
|                       | Homeopathic physician    | 933                      | 151.41 (144.29–158.53)              | 20                     | 24.98 (17.86–32.10)                 | <0.0001           |
|                       | Other physicians         | 955                      | 1032.15 (968.29–1096.01)            | 963                    | 857.33 (793.47–921.20)              | 0.0002            |
|                       | Medication               | 870                      | 570.22 (434.88–705.56)              | 897                    | 486.45 (351.11–621.80)              | 0.391             |
|                       | Productivity loss        | 366                      | 4459.68 (3856.08–5063.27)           | 360                    | 3471.35 (2867.75–4074.94)           | 0.023             |
|                       | Inpatient                | 224                      | 826.94 (561.27–1092.62)             | 213                    | 936.77 (671.10–1202.45)             | 0.567             |
|                       | Other                    | 1016                     | 50.27 (44.98–55.55)                 | 852                    | 46.31 (41.03–51.60)                 | 0.299             |
|                       | <b>Total</b>             | <b>963</b>               | <b>7597.46 (6783.55–8411.37)</b>    | <b>963</b>             | <b>6279.82 (5465.90–7093.73)</b>    | <b>0.025</b>      |
